# Supplementary material for: Is the Hitchcock Story Really True? Public Opinion on Hooded Crows in Cities as Input to Management
Source: MDPI journal article supplement (doi:10.3390/ani12091207), 2022-05-07
Supplement: s1 [file s1]

**Table S2.** Demographic and resident data of the respondents (N = 1740).

| Demographic Variable                                             | Levels                                 | N    | %    |
|------------------------------------------------------------------|----------------------------------------|------|------|
| Gender                                                           | Women                                  | 1276 | 73.3 |
|                                                                  | Men                                    | 464  | 26.7 |
| Age                                                              | Below 19 years                         | 75   | 4.3  |
|                                                                  | Between 20 and 39 years                | 1055 | 60.6 |
|                                                                  | Between 40 and 59 years                | 509  | 29.3 |
|                                                                  | Above 60 years data                    | 101  | 5.8  |
| Highest level of education                                       | Primary school                         | 38   | 2.2  |
|                                                                  | Secondary school                       | 727  | 41.8 |
|                                                                  | High vocational education or BS degree | 684  | 39.3 |
|                                                                  | Master's degree/PhD degree             | 291  | 16.7 |
| Place of residence                                               | Capital                                | 212  | 12.2 |
|                                                                  | County town                            | 852  | 49.0 |
|                                                                  | Urban                                  | 375  | 21.5 |
|                                                                  | Rural                                  | 301  | 17.3 |
| Workplace                                                        | Capital                                | 290  | 16.6 |
|                                                                  | County town                            | 920  | 52.9 |
|                                                                  | Town                                   | 384  | 22.1 |
|                                                                  | Rural                                  | 146  | 8.4  |
| Membership in hunting association                                | Yes                                    | 27   | 1.6  |
|                                                                  | No                                     | 1713 | 98.4 |
| Membership in nature conservation or animal welfare organization | Yes                                    | 169  | 9.7  |
|                                                                  | No                                     | 1571 | 90.3 |
