# Supplementary material for: Is the Hitchcock Story Really True? Public Opinion on Hooded Crows in Cities as Input to Management
Source: MDPI journal article supplement (doi:10.3390/ani12091207), 2022-05-07
Supplement: s1 [file s1]

For two species, correct identification depended on the gender of the respondents. The Hooded Crow was correctly identified by 82% of men and 74% of women ( $\chi^2 = 11.088$ ,  $df = 1$ ,  $p < 0.001$ ,  $\eta^2: 0.0064$ ). In contrast, the Rook was correctly identified by 66% of men and 58% of women ( $\chi^2 = 8.691$ ,  $df = 1$ ,  $p = 0.003$ ,  $\eta^2: 0.005$ ). Age had no effect on species knowledge except in cases of Magpie ( $\chi^2 = 16.823$ ,  $df = 3$ ,  $p = 0.001$ ,  $\eta^2: 0.0097$ ) and Jay ( $\chi^2 = 12.55$ ,  $df = 3$ ,  $p = 0.006$ ,  $\eta^2: 0.0072$ ) because older age groups were more successful in recognizing these species.
